# Supplementary material
Source: PubMed Central journal article supplement (PMC9588742)
Supplement: NIHMS1831570-supplement-1.pdf [file NIHMS1831570-supplement-1.pdf]

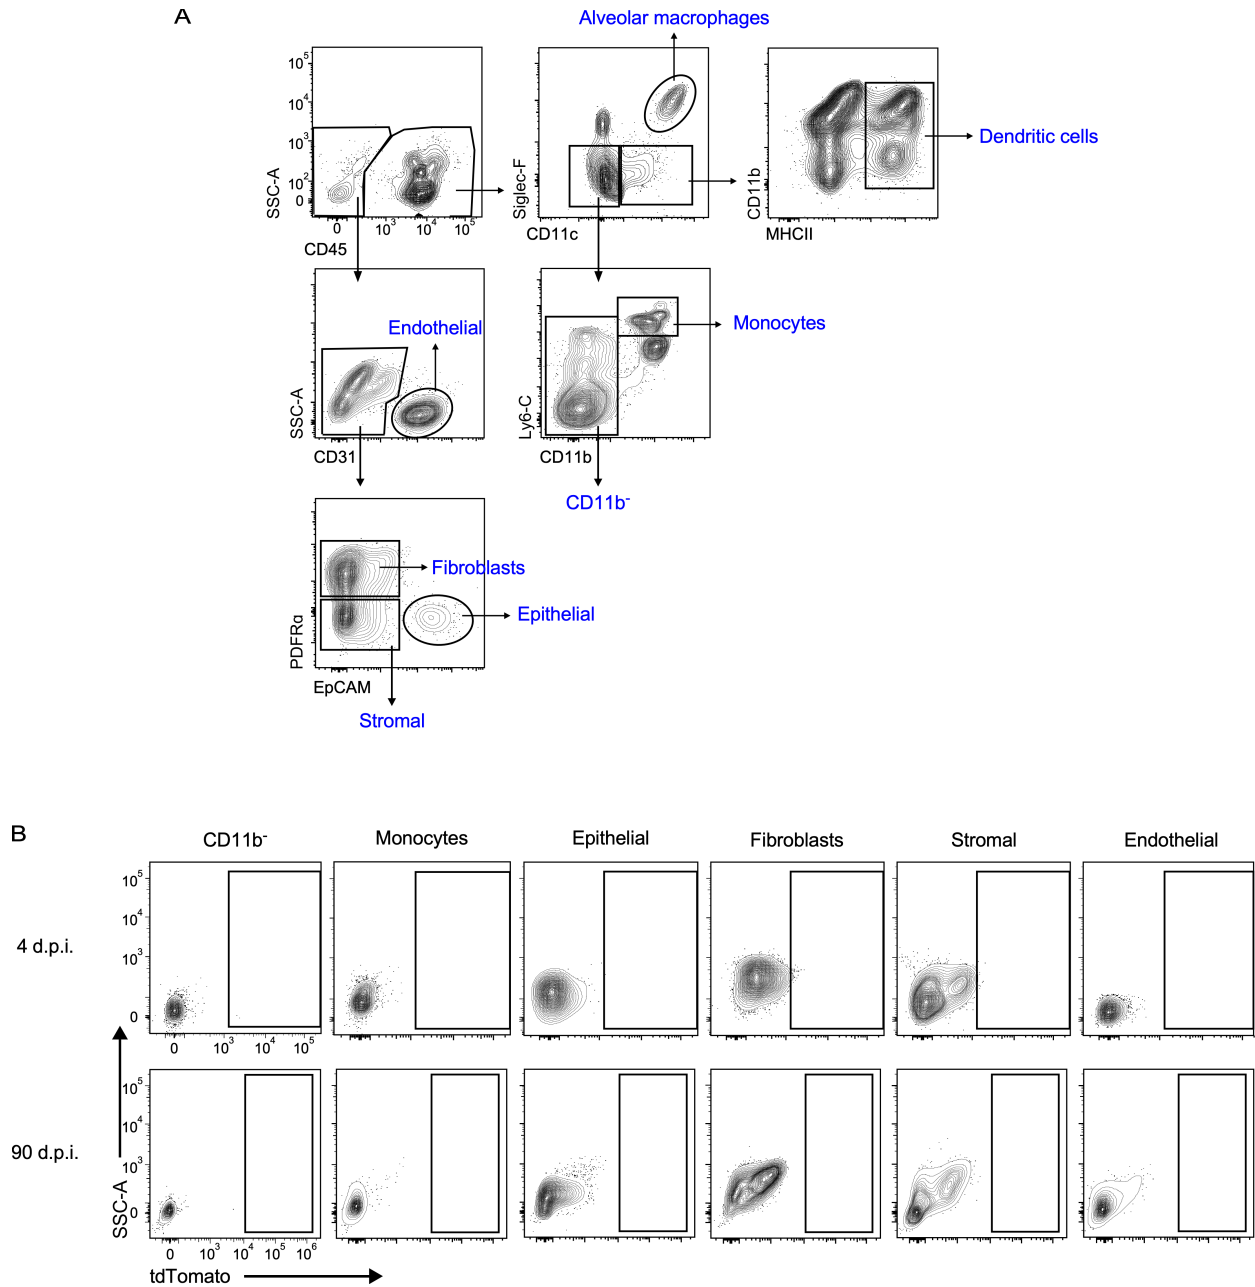

**Figure S1. Immunization with Ad-Cre does not result in tdTomato expression in other cell types. (A)** Example gating strategy for all cell types analyzed in the lungs of Ai14 reporter mice following immunization with Ad-Cre. **(B)** Example staining for tdTomato in indicated cell types on days 4 and 90 post-immunization with Ad-Cre.  $n = 3-5$  mice per timepoint, 2 experiments per timepoint.

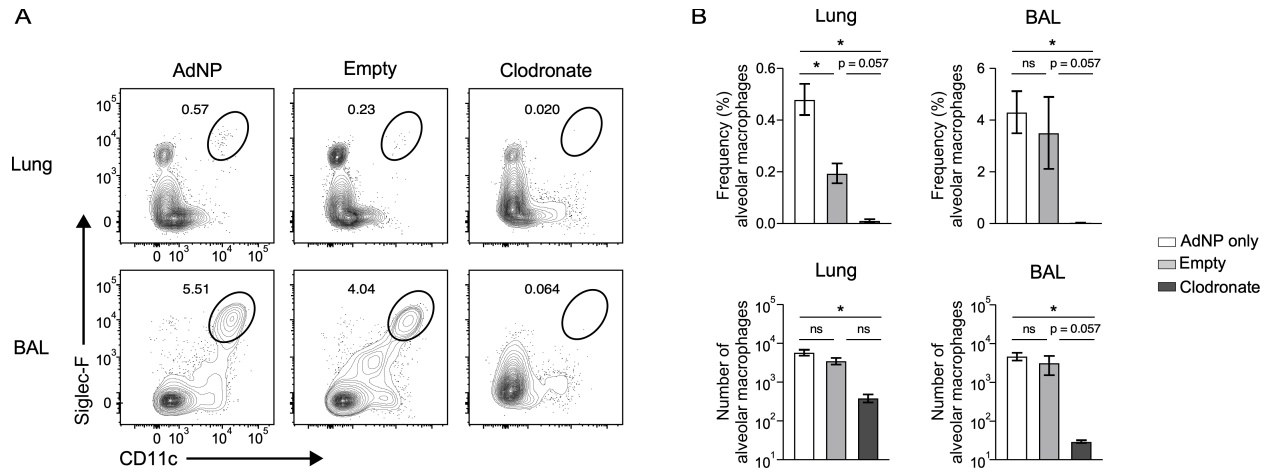

**Figure S2. Liposomal clodronate successfully depletes alveolar macrophages in the lung and airways. (A)** Example staining for live CD45<sup>+</sup> CD11c<sup>+</sup> Siglec-F<sup>+</sup> alveolar macrophages in the lung and BAL of AdNP-immunized mice 48 hours post-intra-tracheal administration of empty or clodronate liposomes. **(B)** Frequency (top row) and number of alveolar macrophages in the lung and BAL 48 hours after treatment with liposomes. n= 3-5 mice per group, 1 experiment. Significance was determined using a Mann-Whitney test. Data represent mean ± SEM. P values are as follows: \* = p<0.05, \*\* = p<0.01, \*\*\* = p<0.001, ns= not significant.
